# Supplementary material for: Growth of silver nanowires on GaAs wafers
Source: Royal Society of Chemistry journal article supplement (doi:10.1039/c1nr10153f), 2011-01-01
Supplement: c1nr10153f.pdf [file c1nr10153f.pdf]

## **Electronic Supplementary Information**

### **Growth of Silver Nanowires on GaAs Wafers**

Yugang Sun\*

Center for Nanoscale Materials, Argonne National Laboratory, 9700 South Cass Avenue,  
Argonne, Illinois 60439 (USA).

Fax: +1-630-252-4646; Tel: +1-630-252-3716;

E-mail: [ygsun@anl.gov](mailto:ygsun@anl.gov)

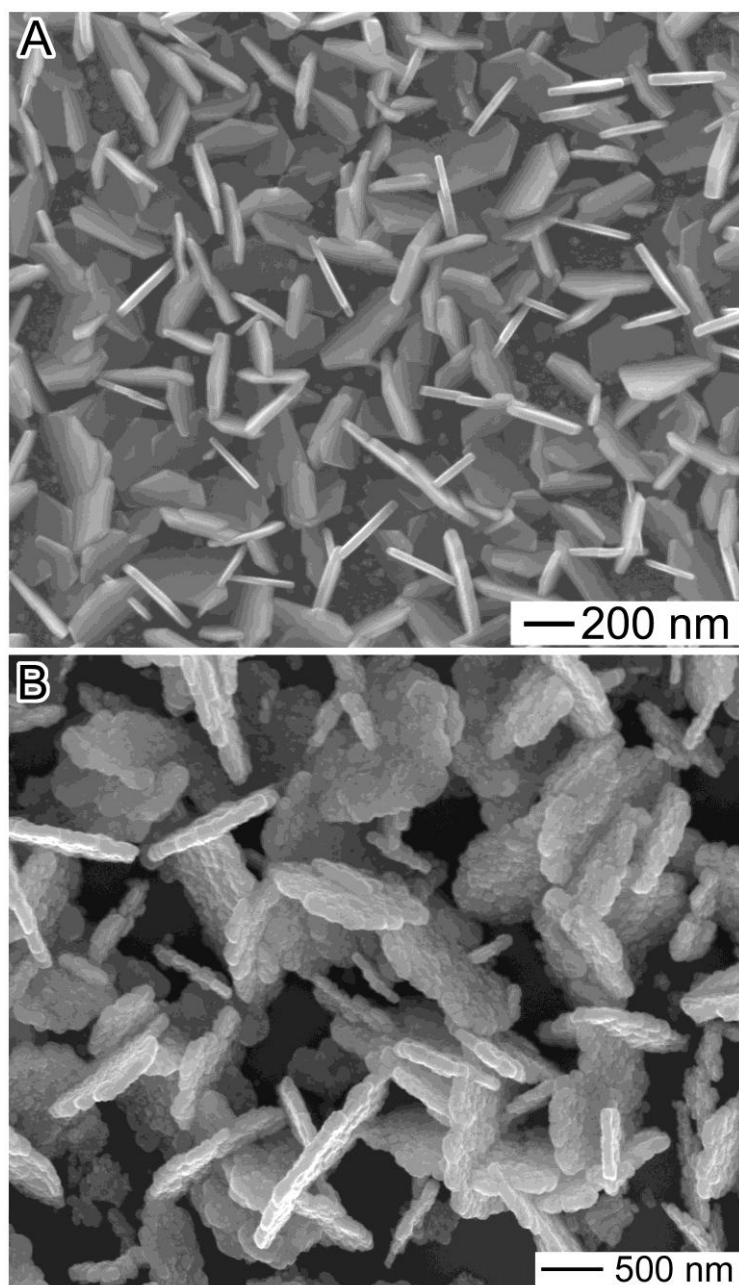

**Figure S1.** (A) SEM image of the Ag nanoplates on a n-GaAs wafer doped with Si at a concentration of  $1.5 \times 10^{18} \text{ cm}^{-3}$  that were obtained through the reaction between the wafer and an aqueous solution of  $\text{AgNO}_3$  with a concentration of 1 M for 2 min at room temperature.[Y. Sun, *Chem. Mater.*, 2007, **19**, 5845.] (B) SEM image of the Ag nanoplates on a n-GaAs wafer doped with Si at a concentration of  $1 \times 10^{18} \text{ cm}^{-3}$  that were obtained through the reaction between the wafer and an aqueous solution of  $\text{AgNO}_3$  with a concentration of 0.1 M for 10 min at room temperature.[Y. Sun and G. P. Wiederrecht, *Small*, 2007, **3**, 1964.]

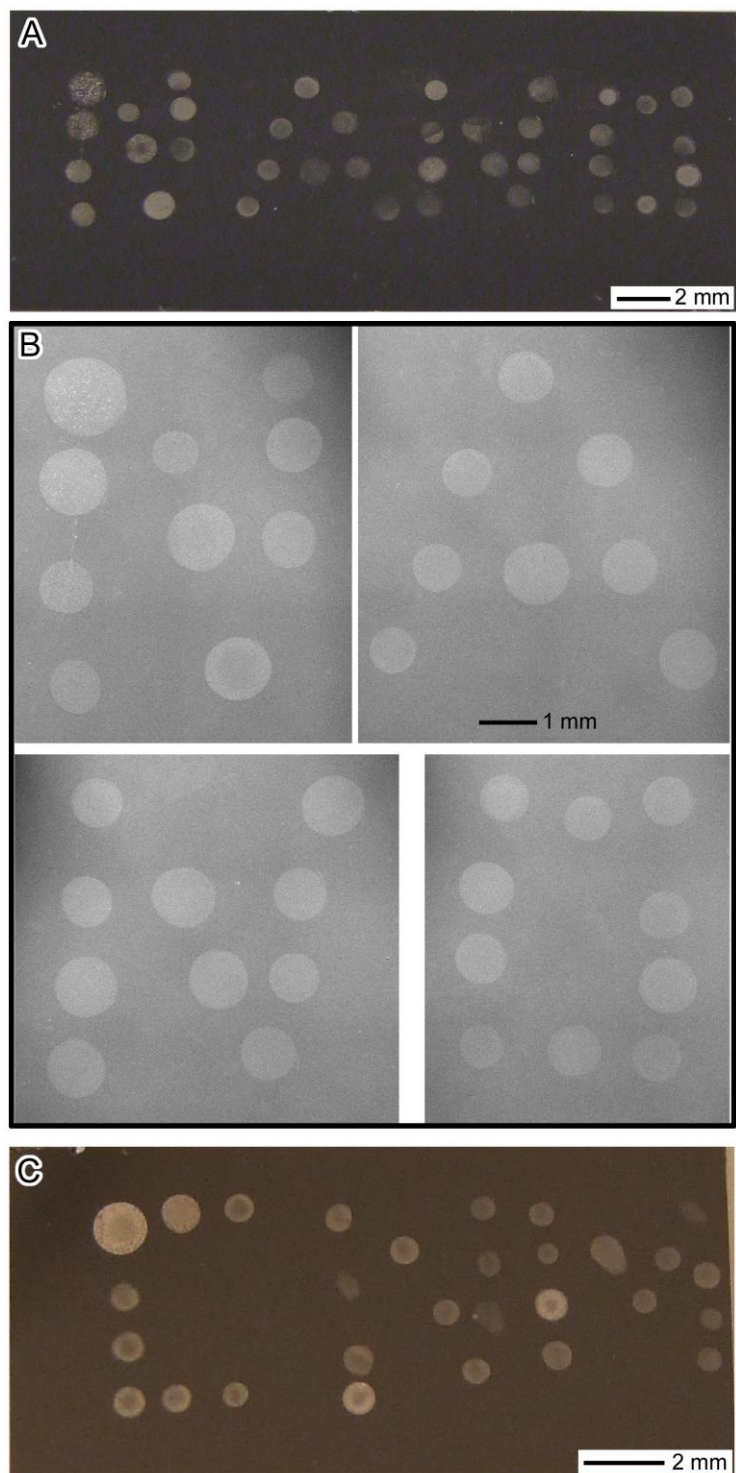

**Figure S2.** (A) Optical and (B) SEM image of a “NANO” pattern consisting of brightly dotted areas where Ag nanowires (shown in Figure 1) have been grown. (C) Optical image of a pattern of “CNM”.

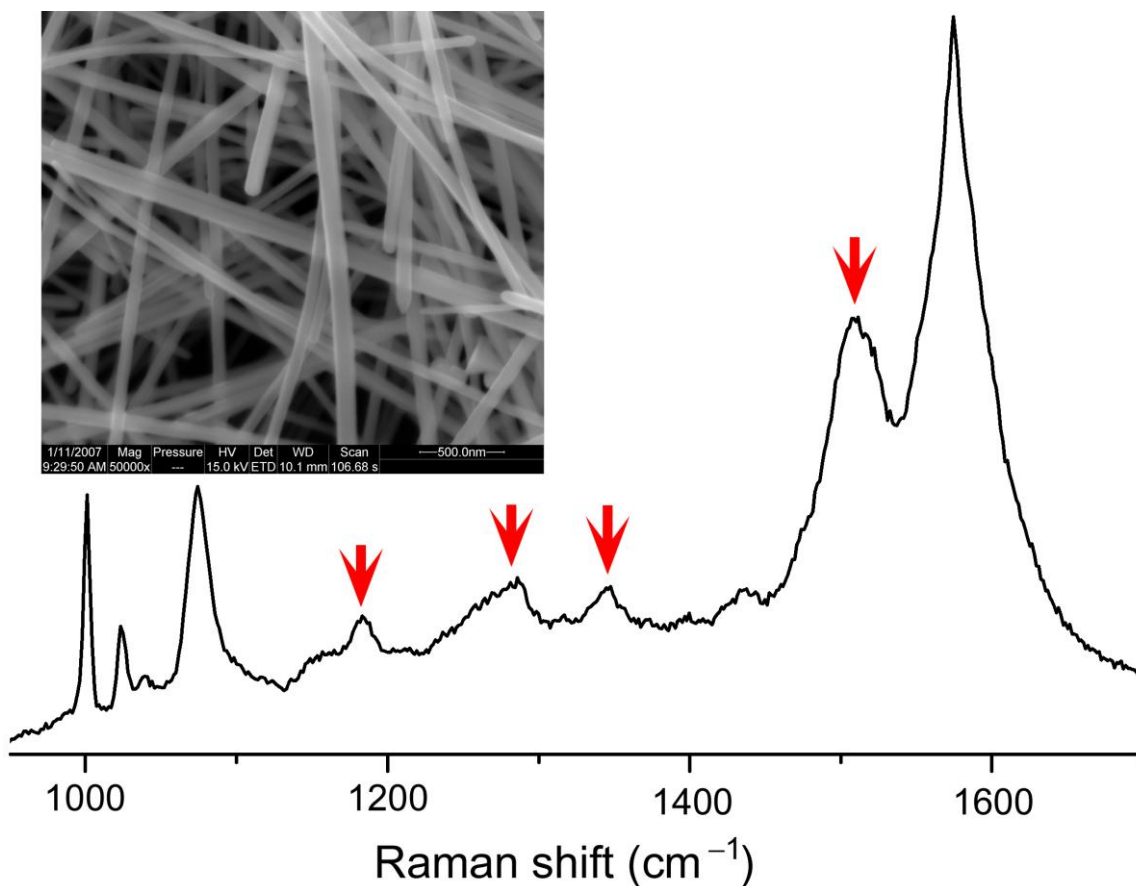

**Figure S3.** Raman spectrum recorded from a film of Ag nanowires that were synthesized through a polyol process with PVP as surfactant after the nanowire film had been soaked in a 1% ethanolic solution of thiophenol for 22 hrs at room temperature. In addition to the appearance of strong peaks of thiophenol, peaks of PVP (highlighted by red arrows) also appear.

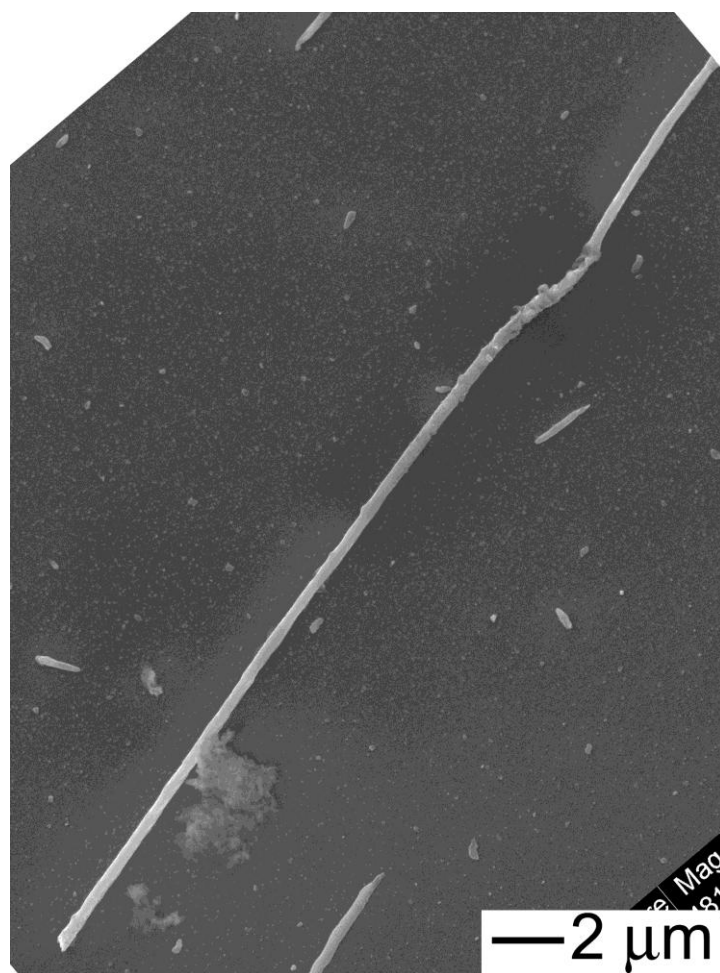

**Figure S4.** SEM image of the Ag nanowire shown in Figure 8C after it was applied with a breakdown current and the probes were moved.
